# Supplementary material
Source: publisher figshare collection journal article supplement (https://sage.figshare.com/ndownloader/files/33082492)
Supplement: Supplementary file 1 [file 33082492]

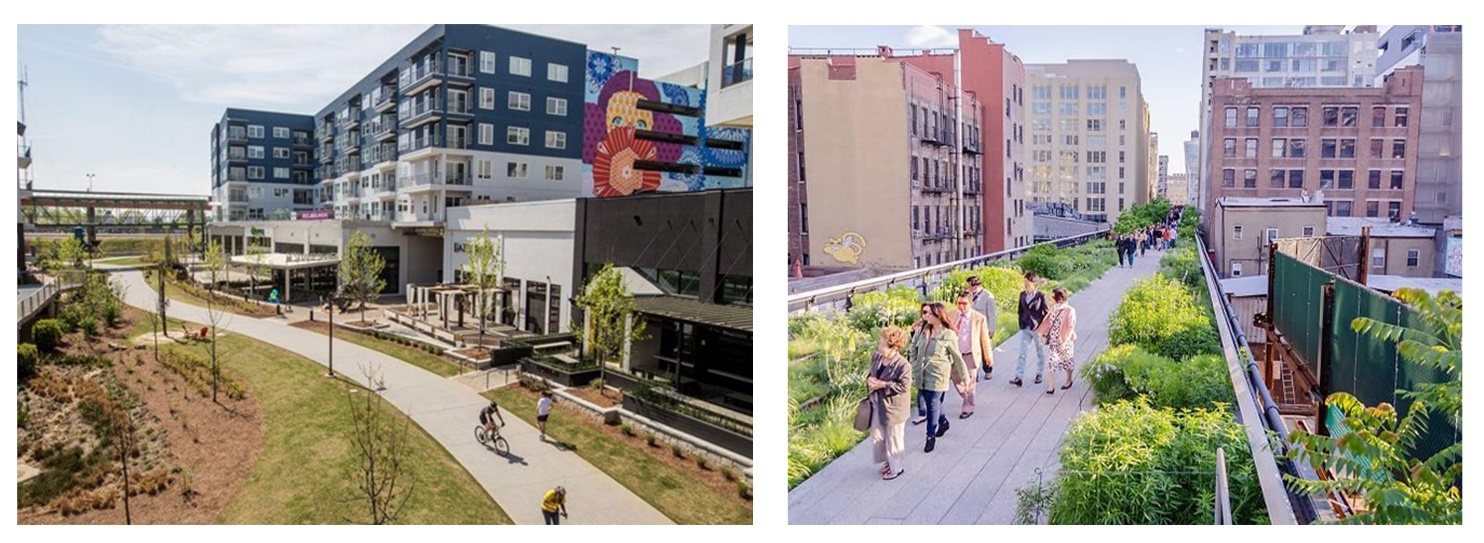
Figure. S1. Scene from Atlanta Beltline Park(left) retrieved from: <https://www.ajc.com/business/beltline-urges-recreational-visitors-stay-away-prevent-crowds/I2146qZ806gQBGtjiJomZO/>; Scene from the High Line Park (right) retrieved from: https://www.timeout.com/newyork/parks/highline


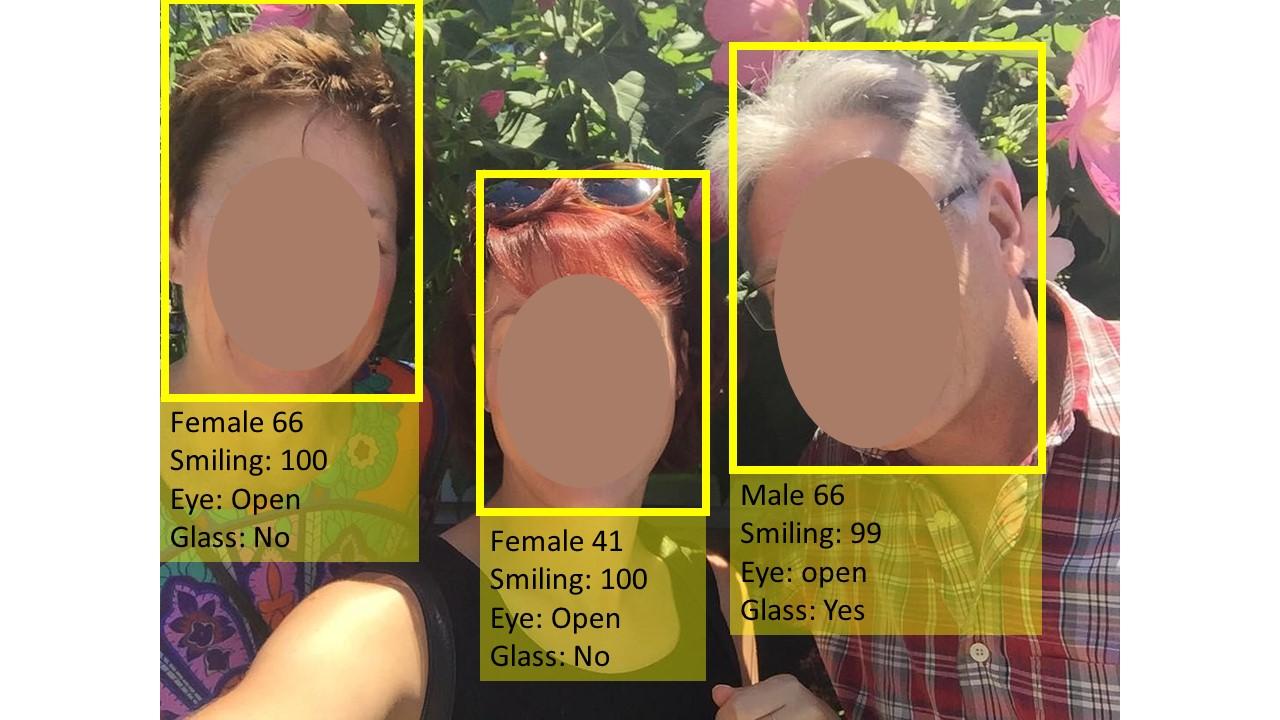


Figure S2. Examples of face detection results from FacePlusPlus


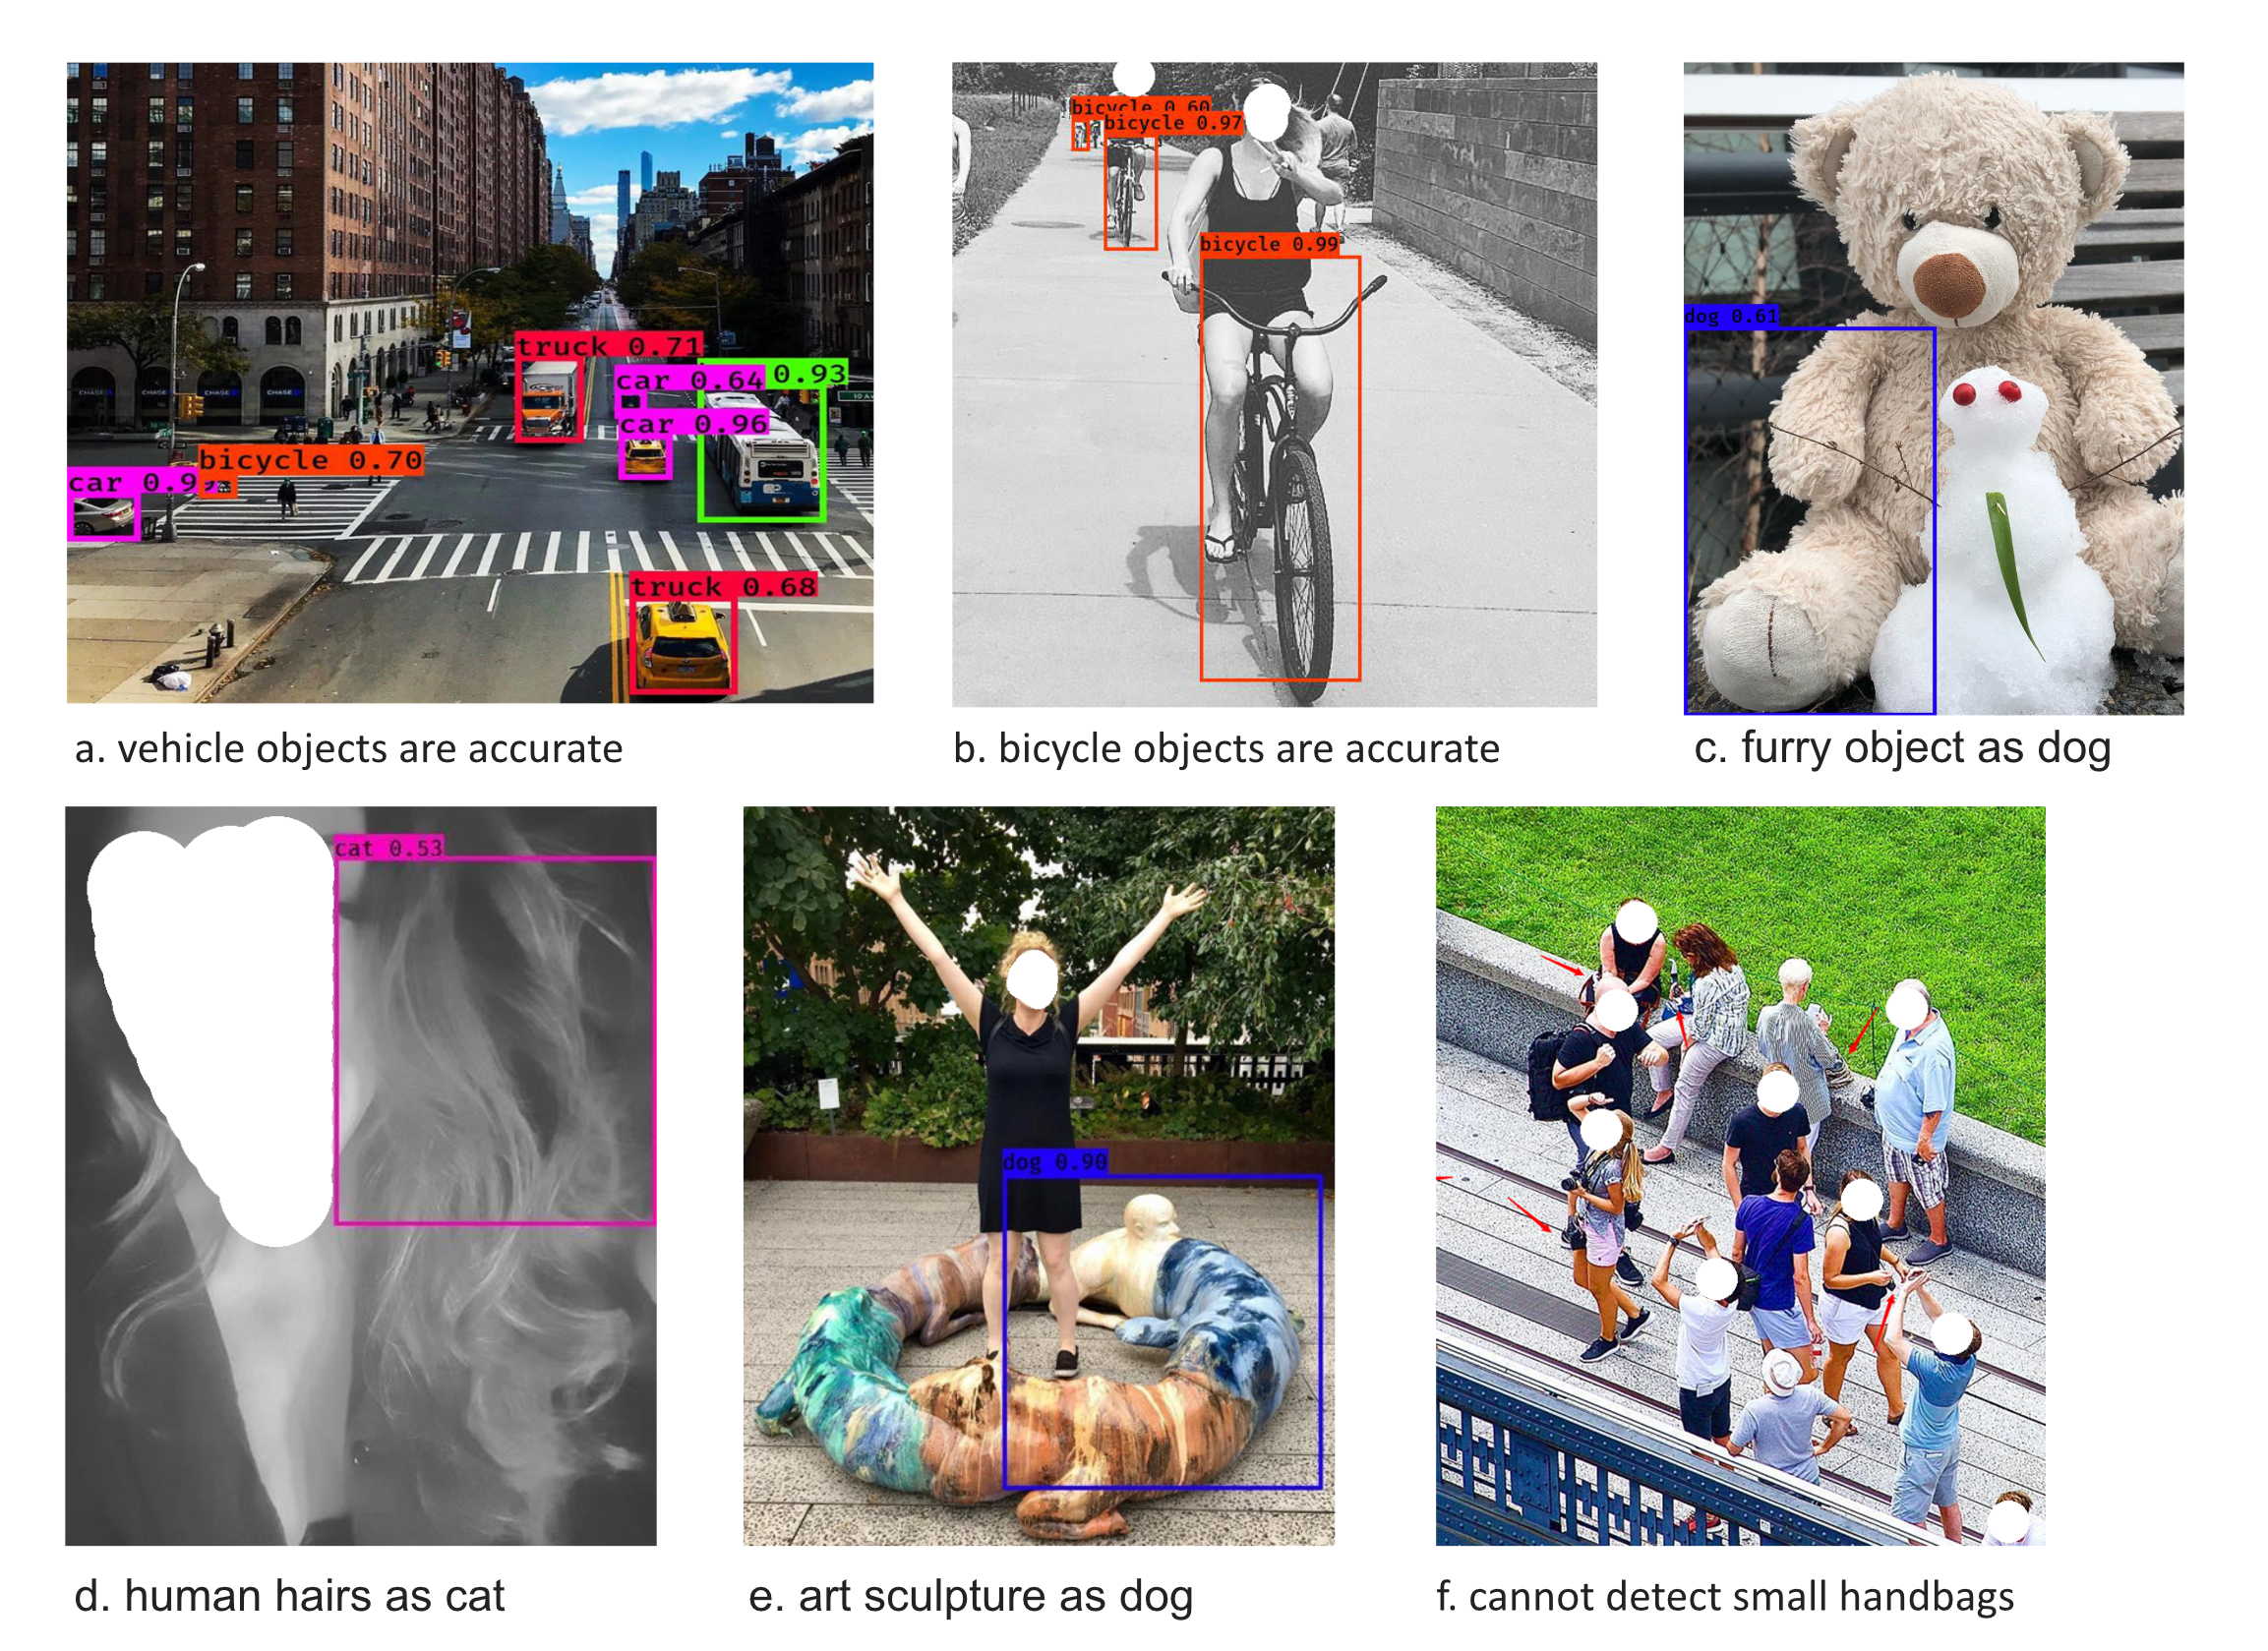


Figure S3. Examples of object detection result.
